# Supplementary material for: Synthesis of a library of oligothiophenes and their utilization as fluorescent ligands for spectral assignment of protein aggregates
Source: Royal Society of Chemistry journal article supplement (doi:10.1039/c1ob05637a), 2011-01-01

# 01 t-HTAA

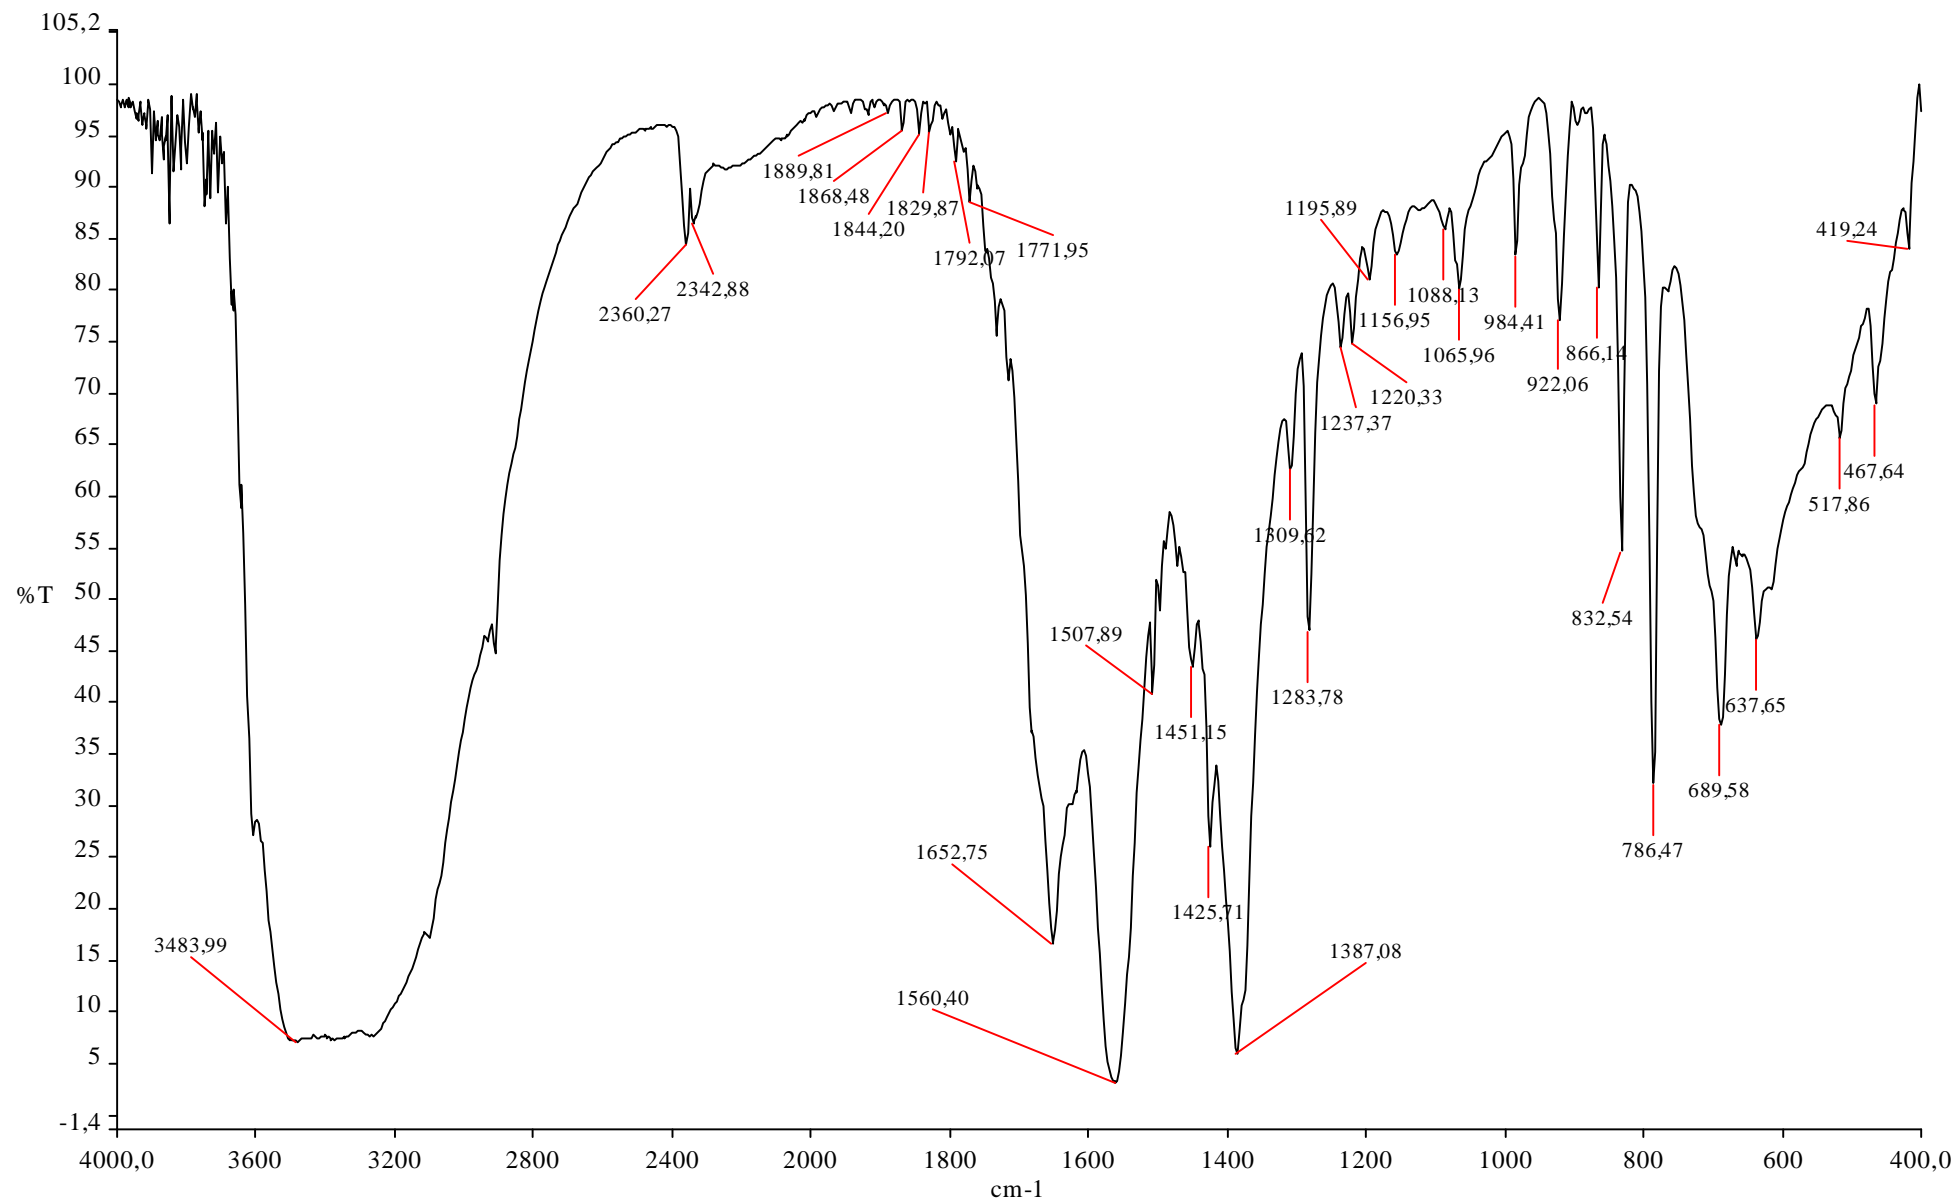

### 02 q-HTAA

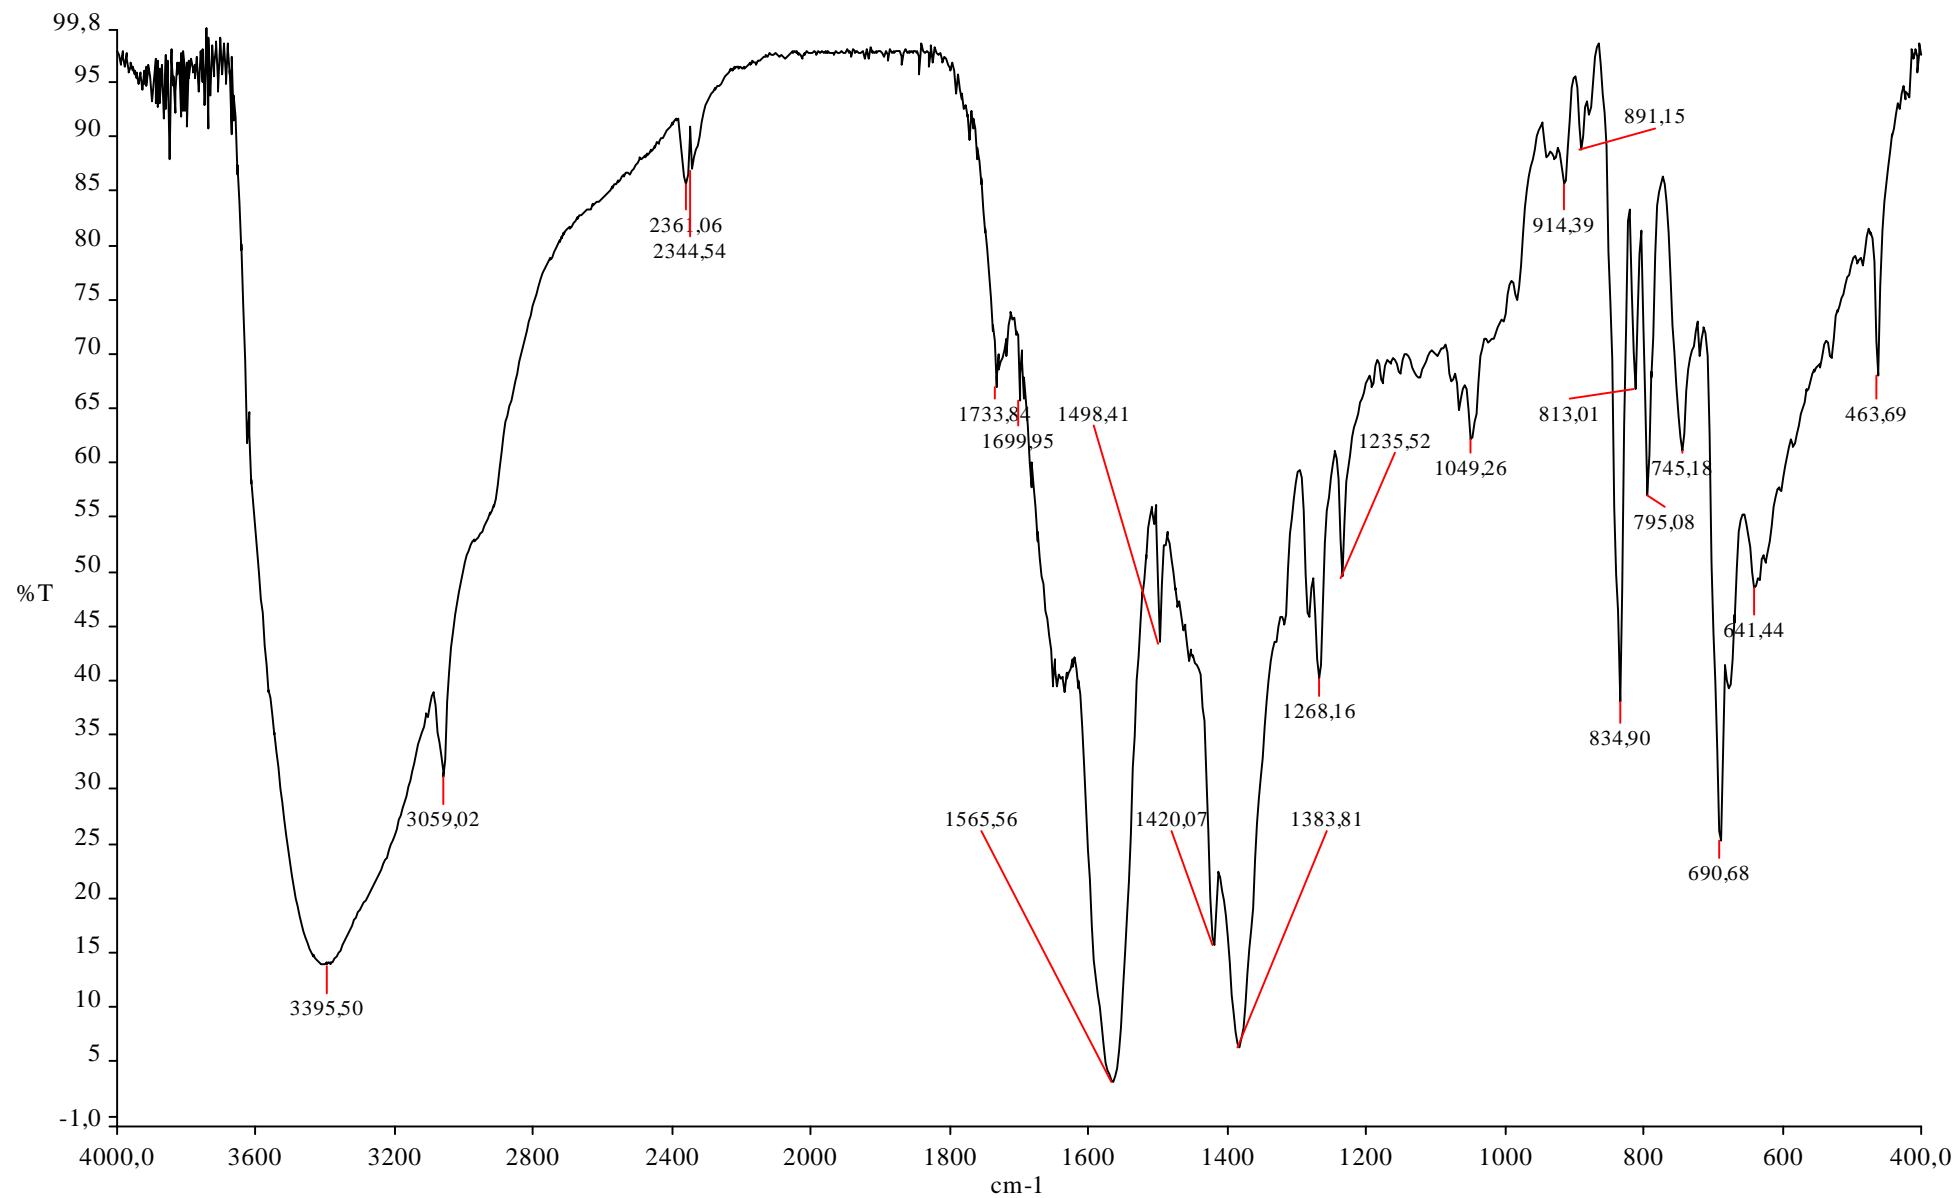

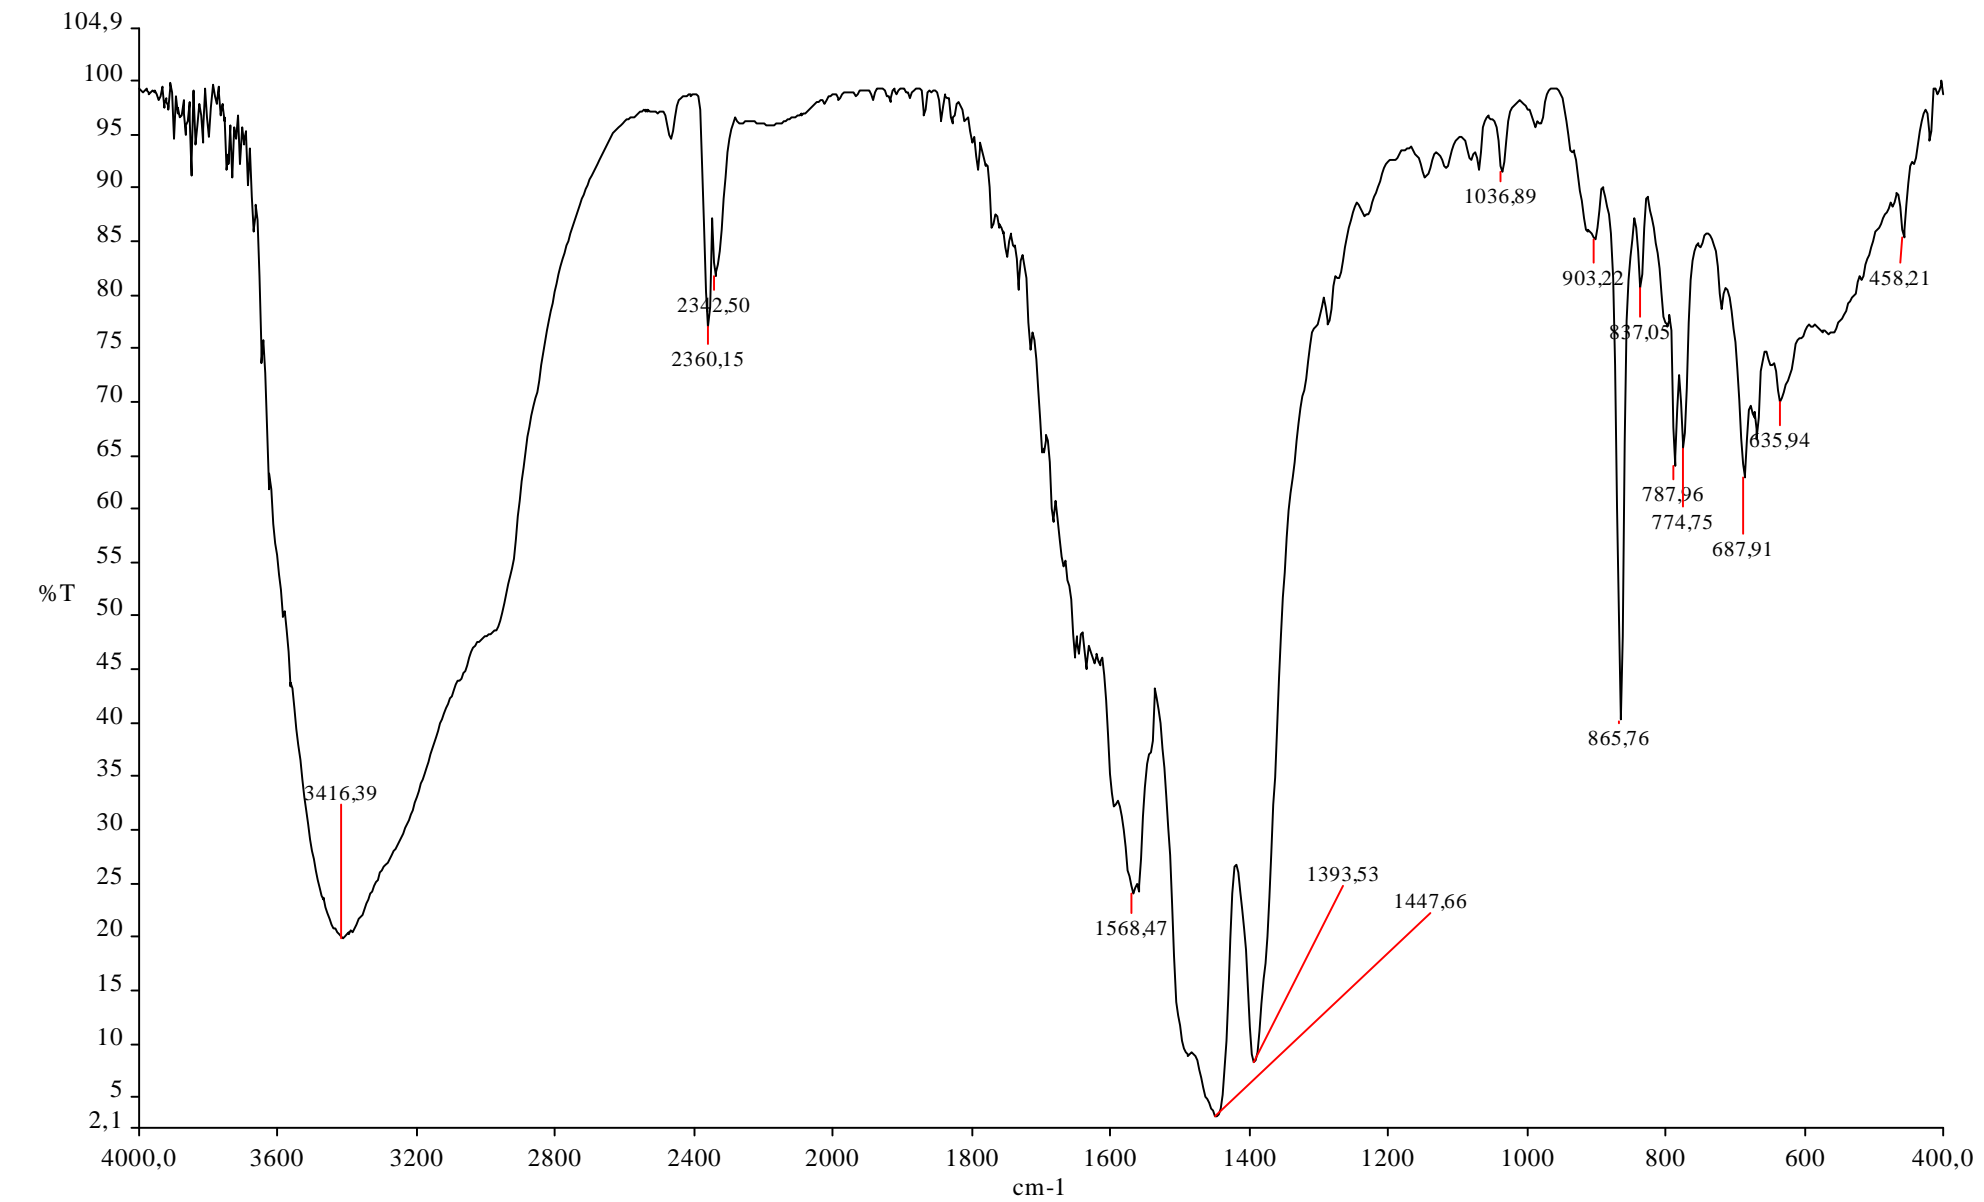

### 06 hx-HTAA

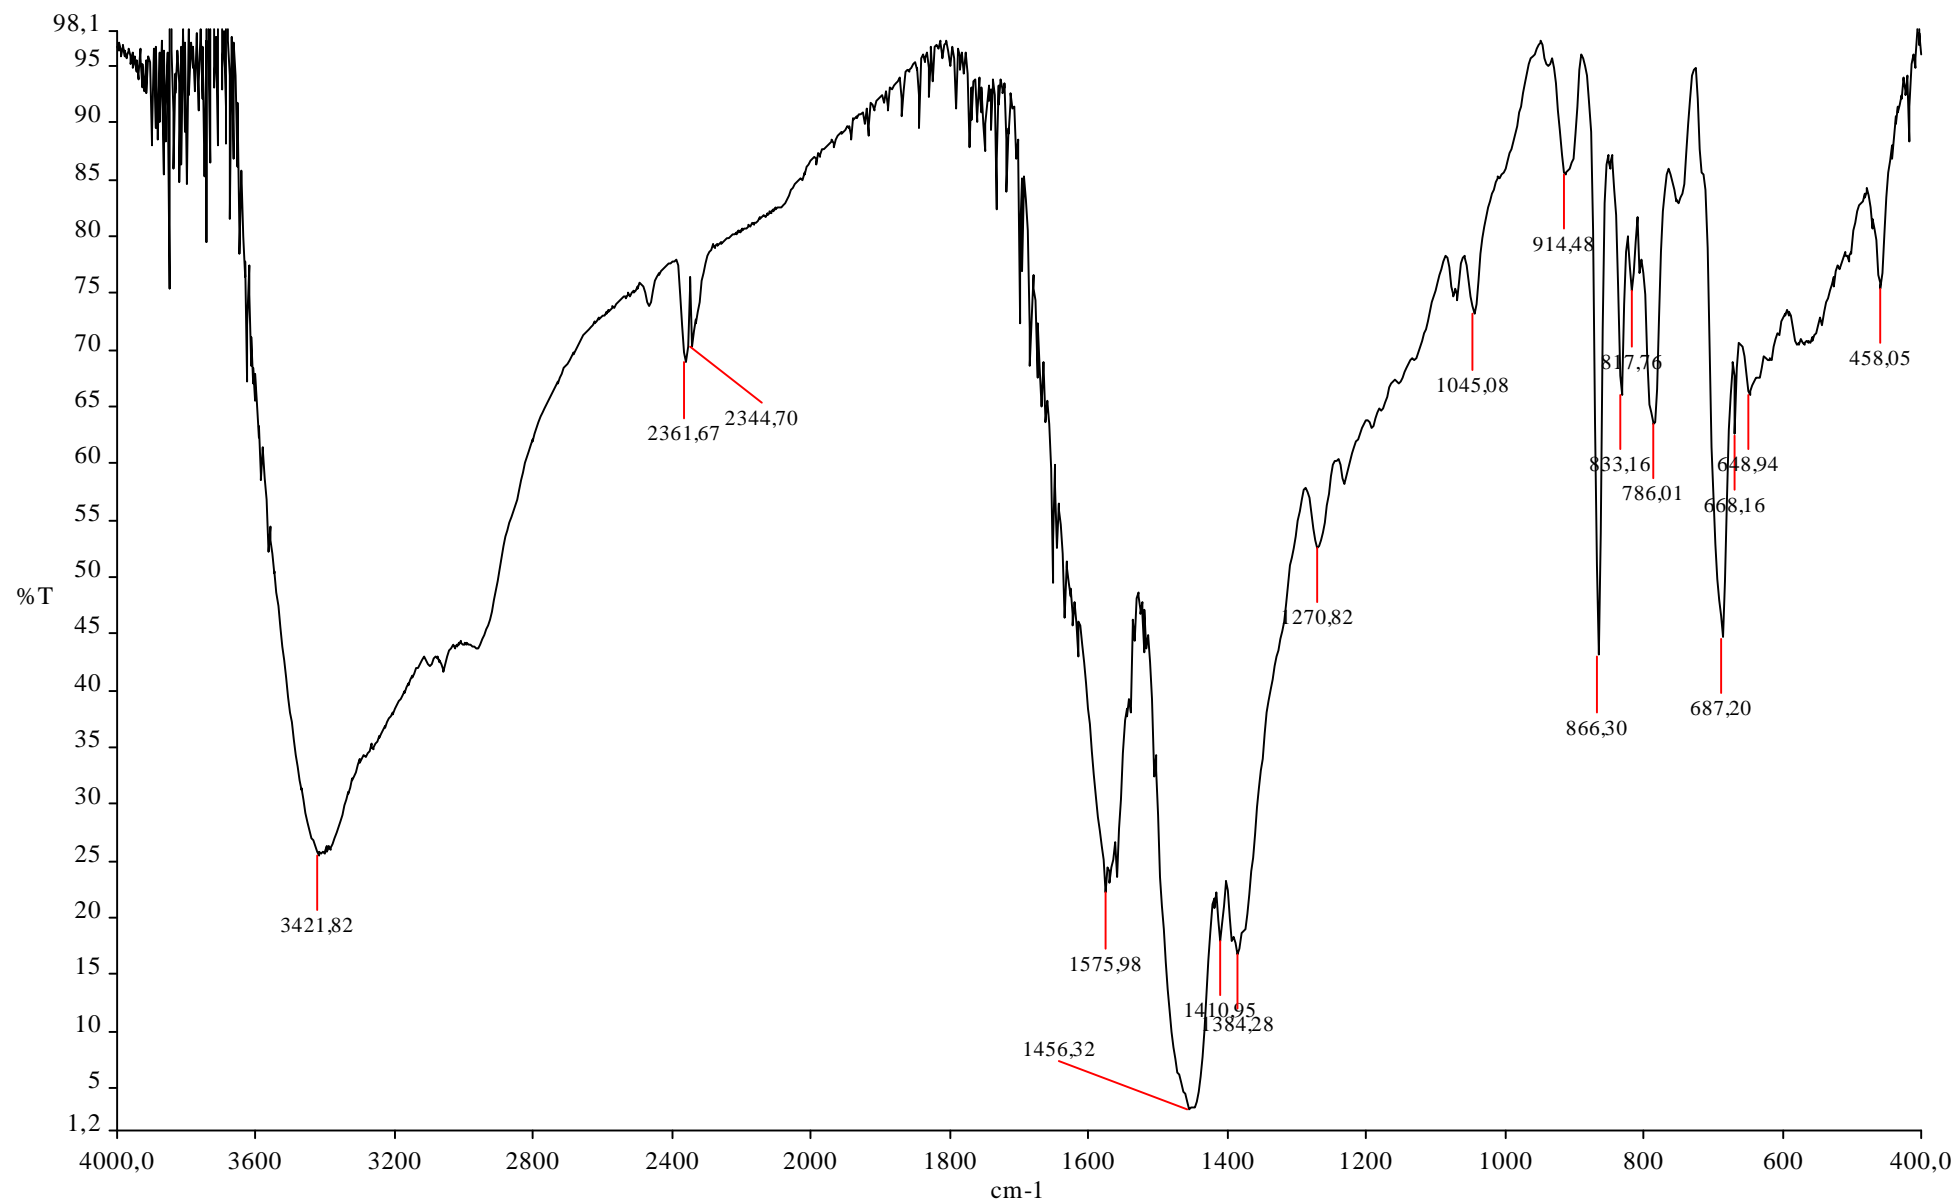

07 hx-FTAA

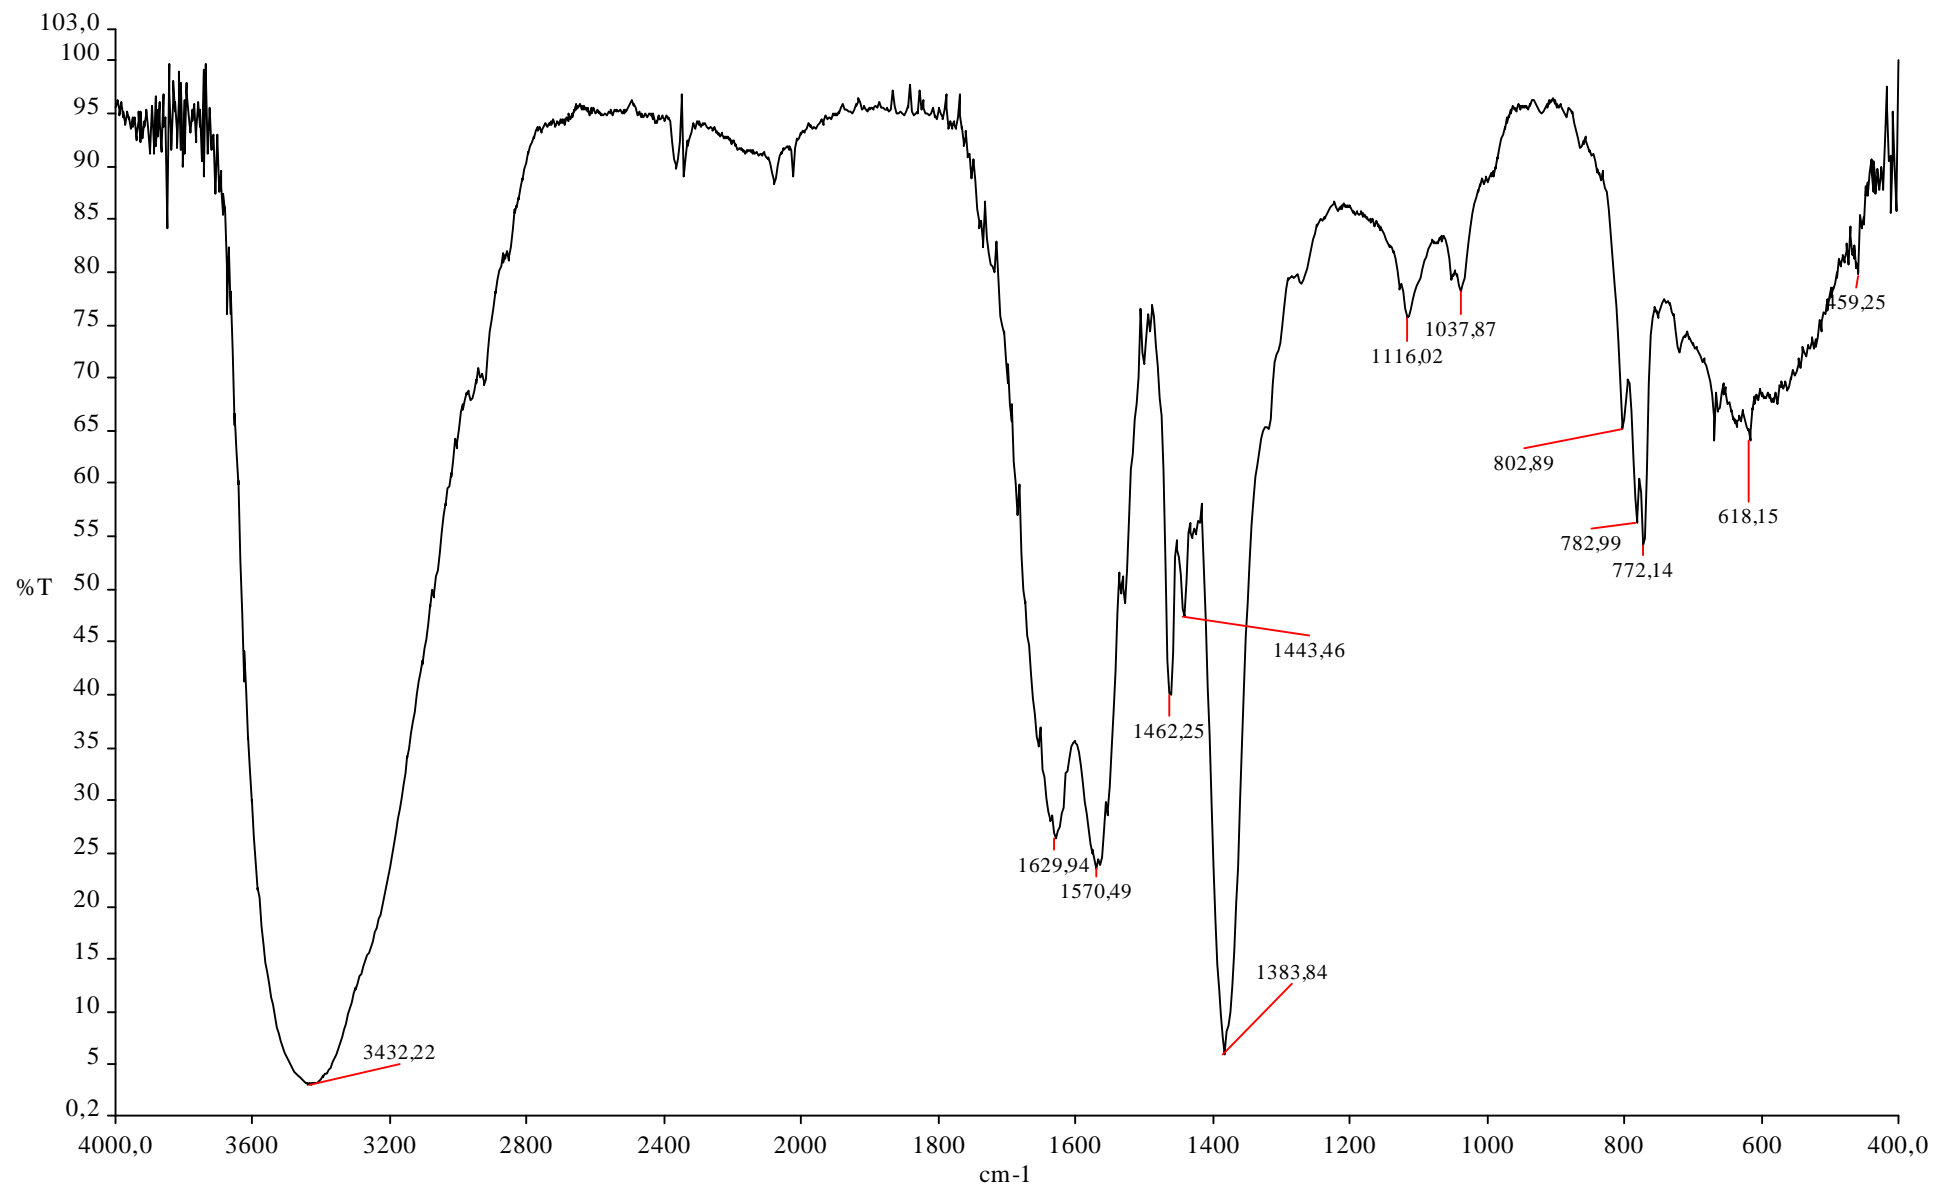

### 08 h-HTAA

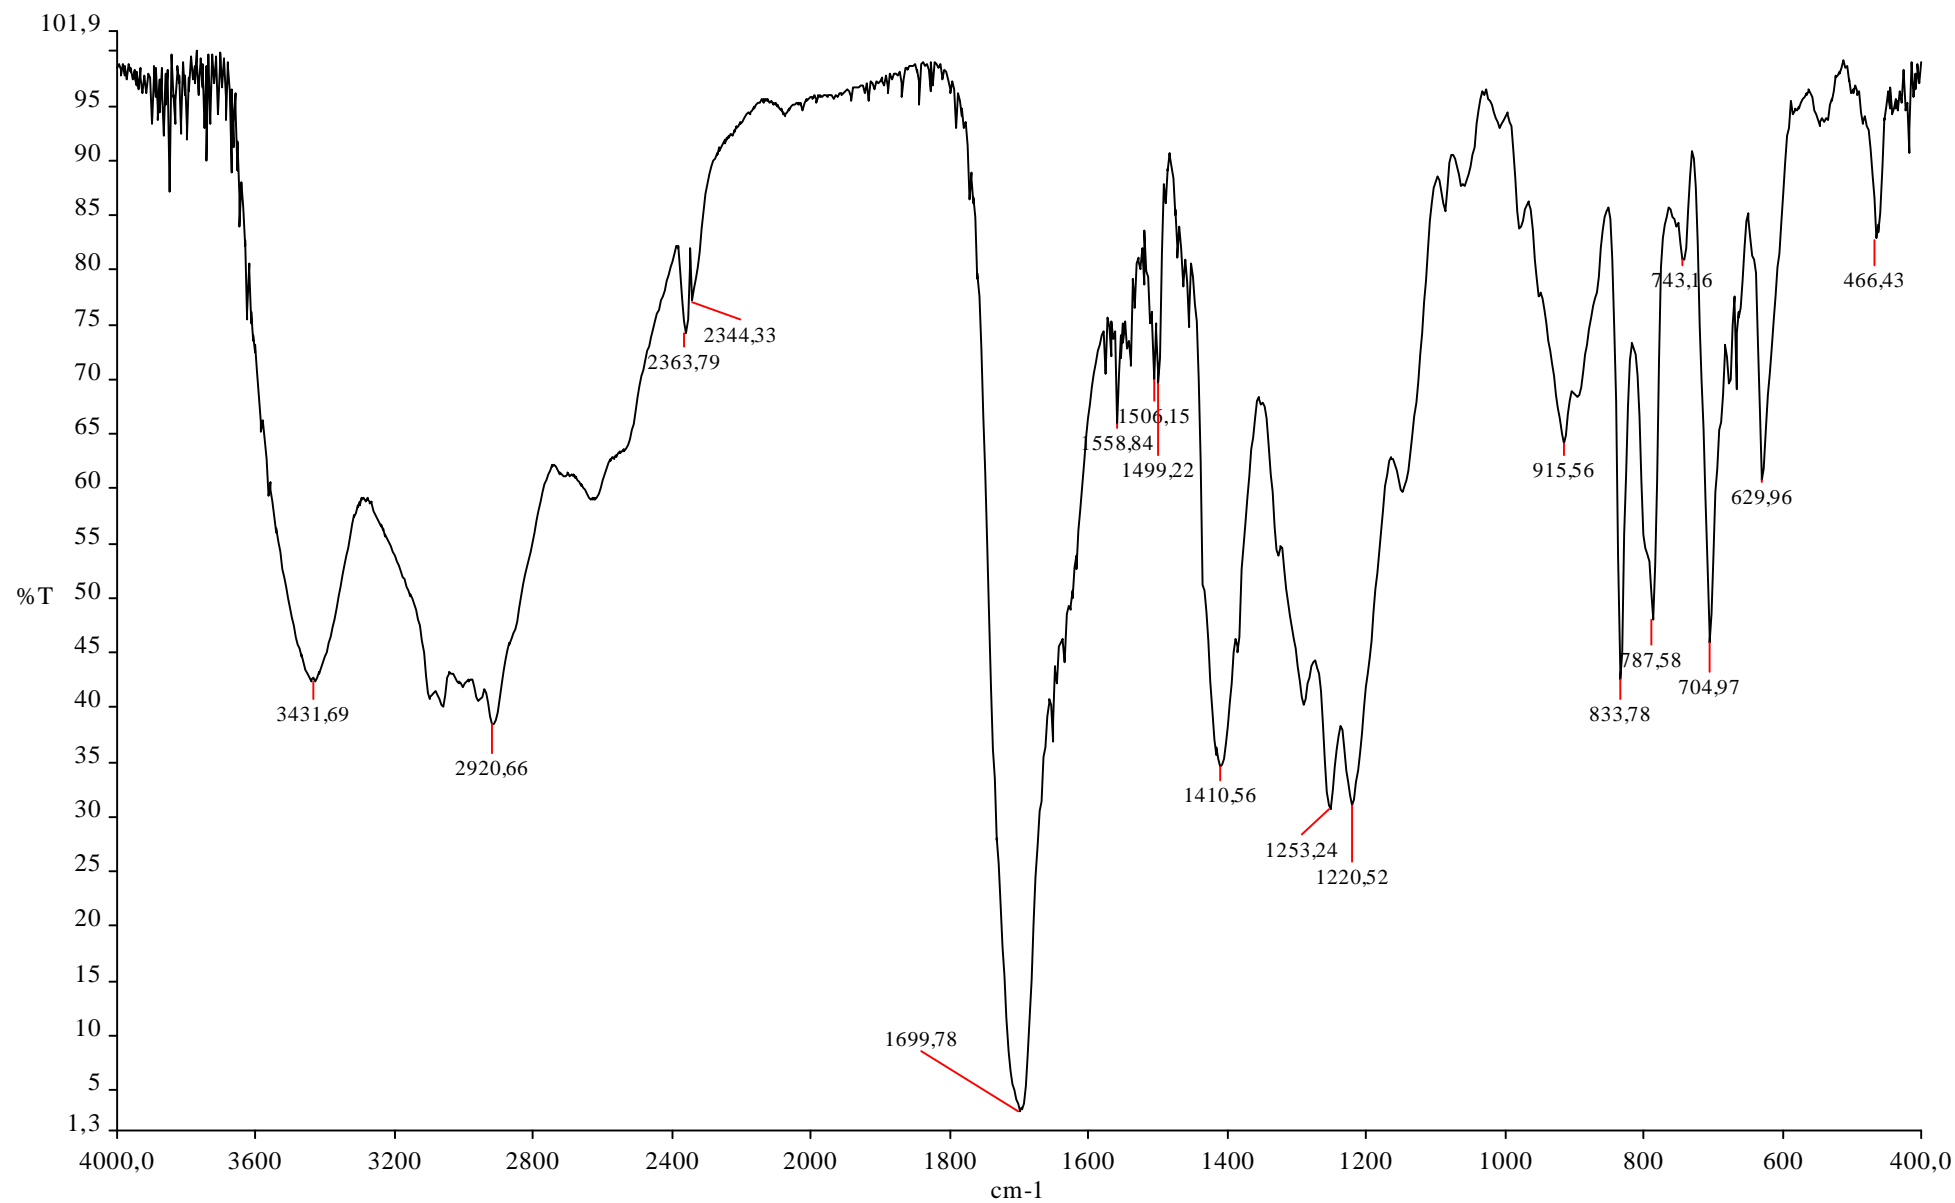

09 h-FTAA

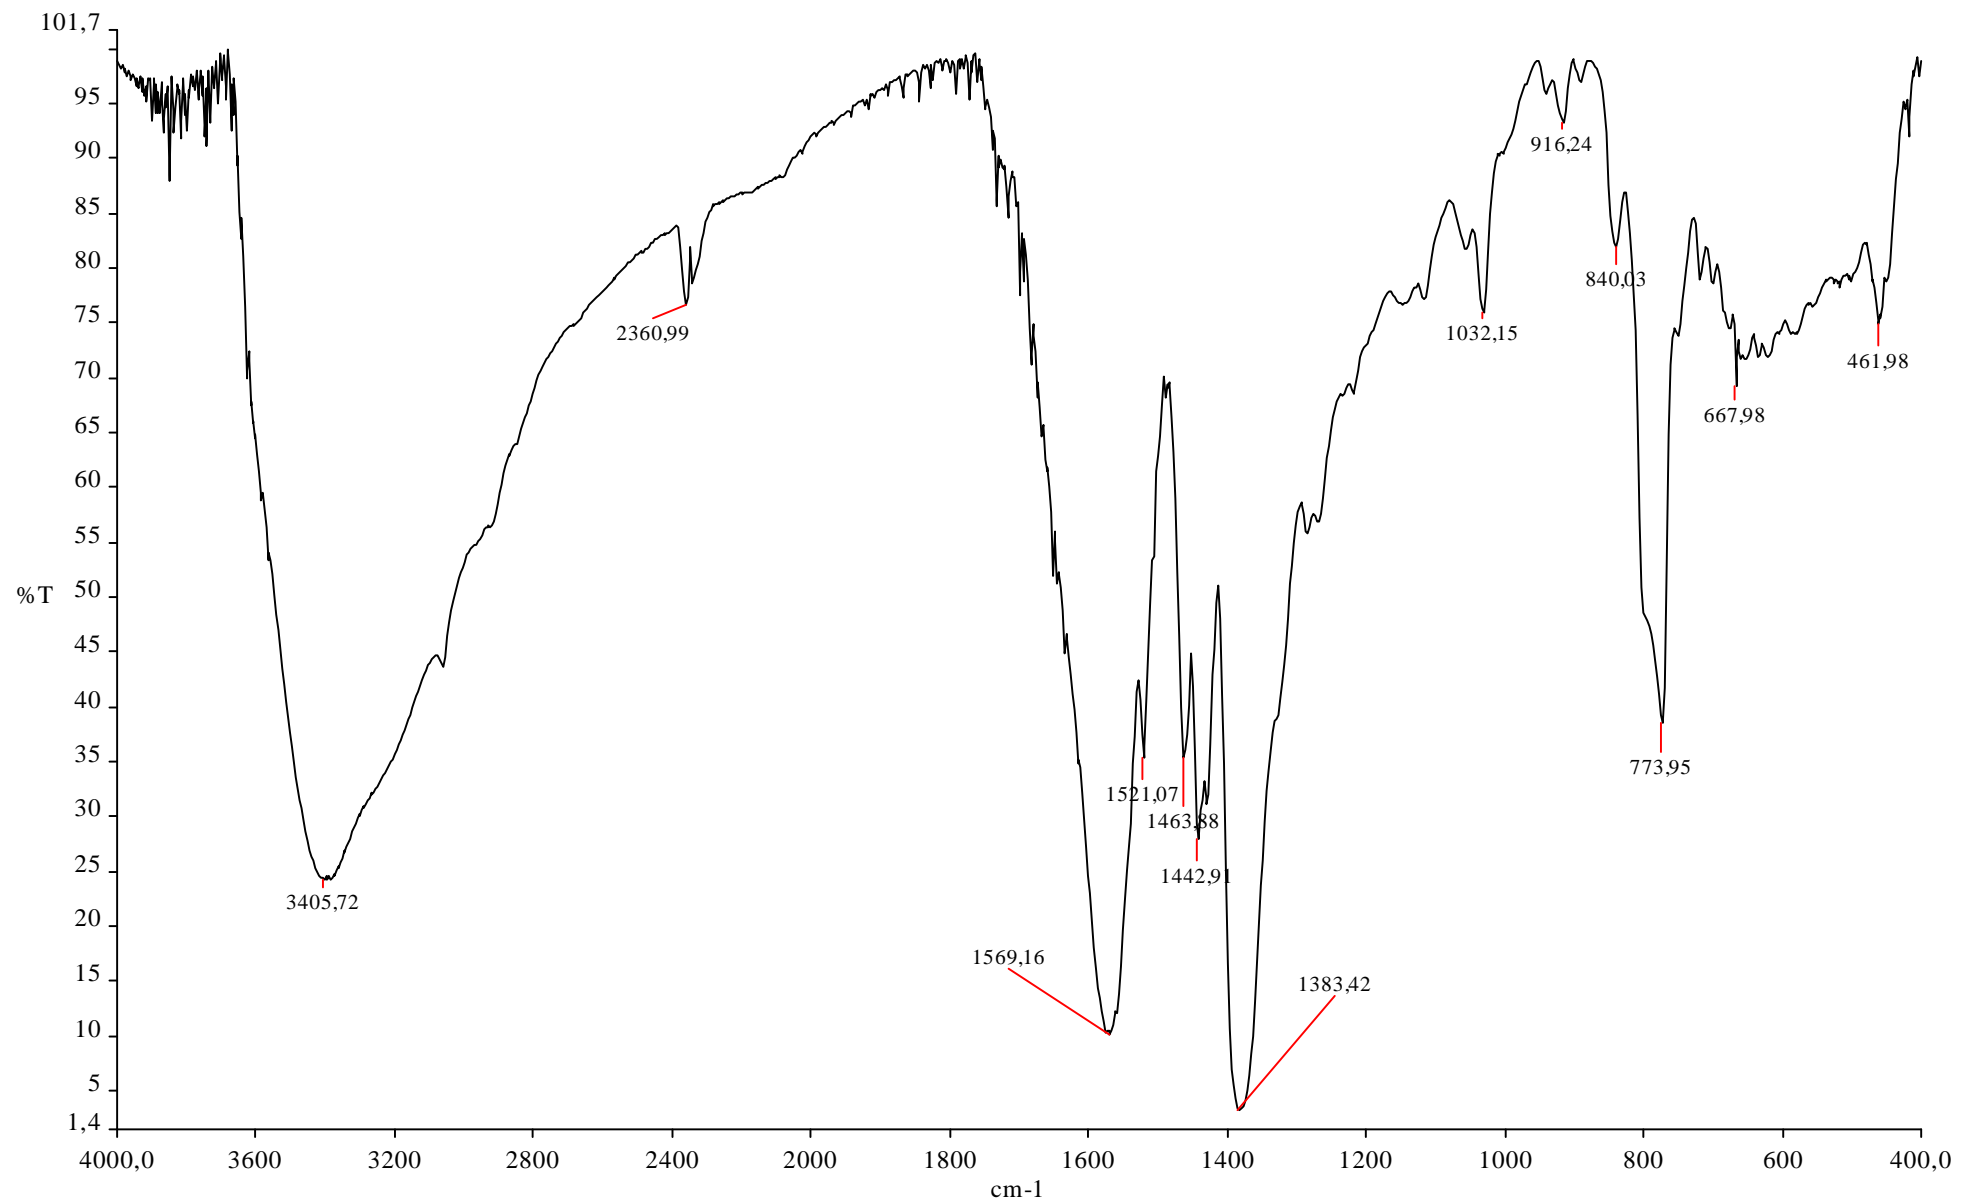

### 11 Mono-Br-Trimer

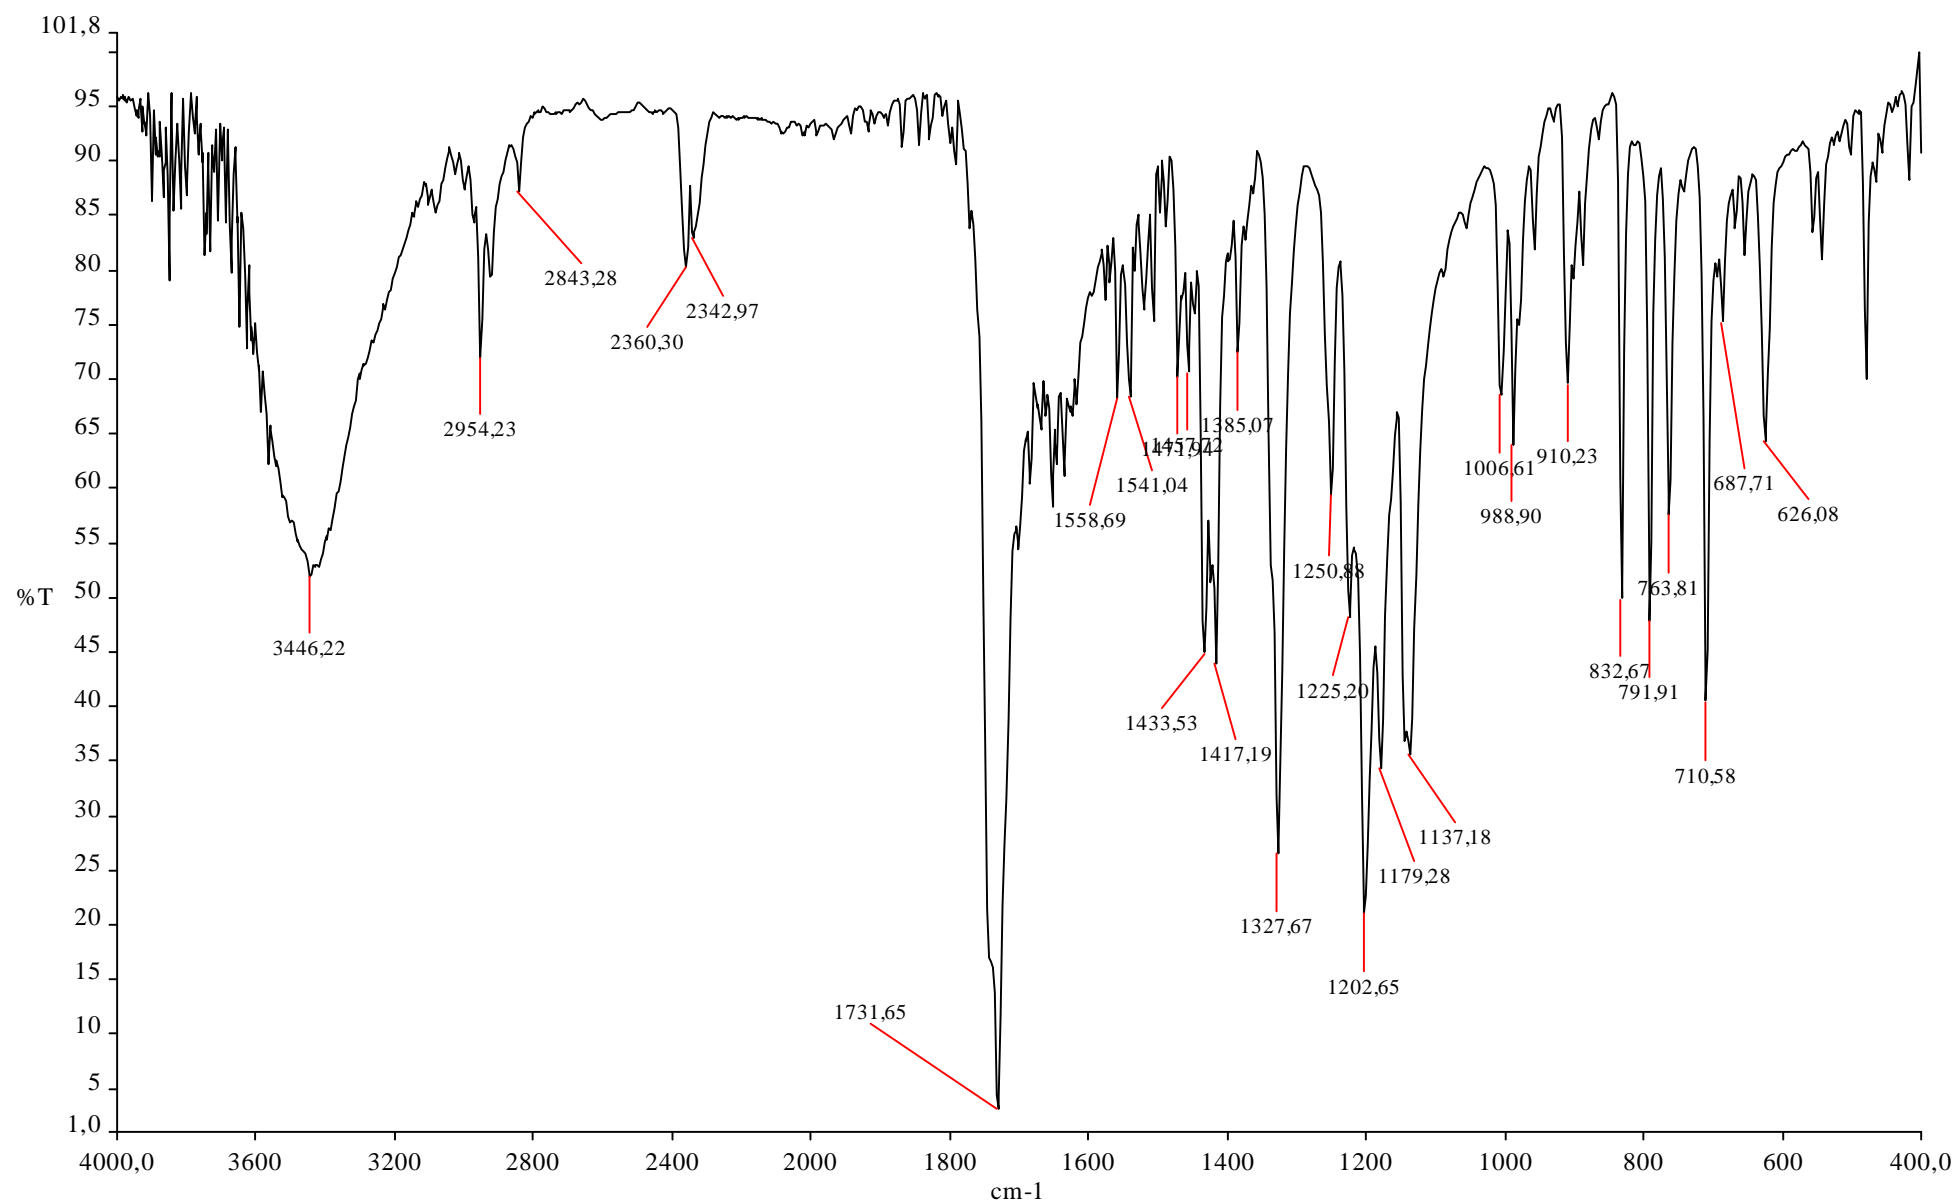



### 12 q-HTAM

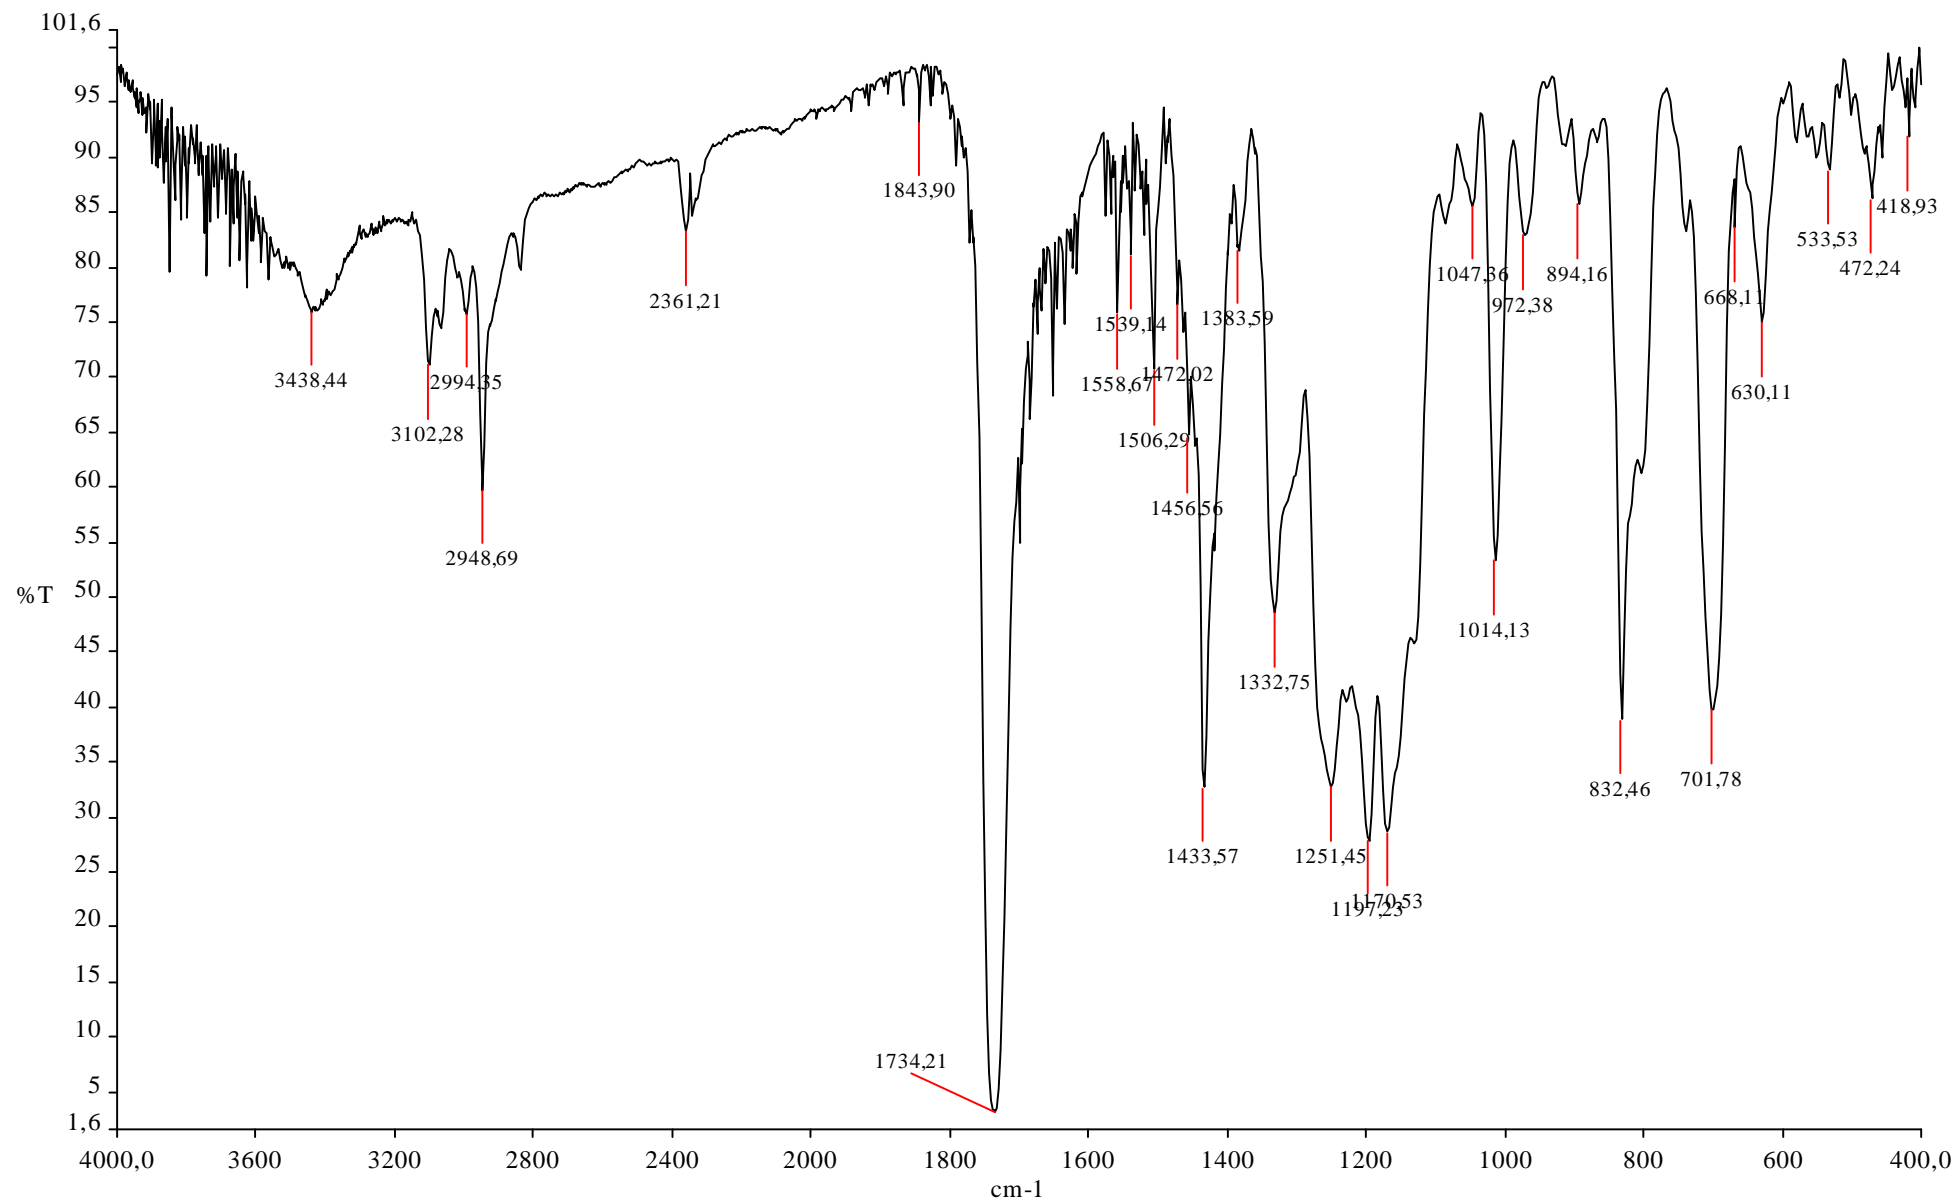

### 13 q-FTAM

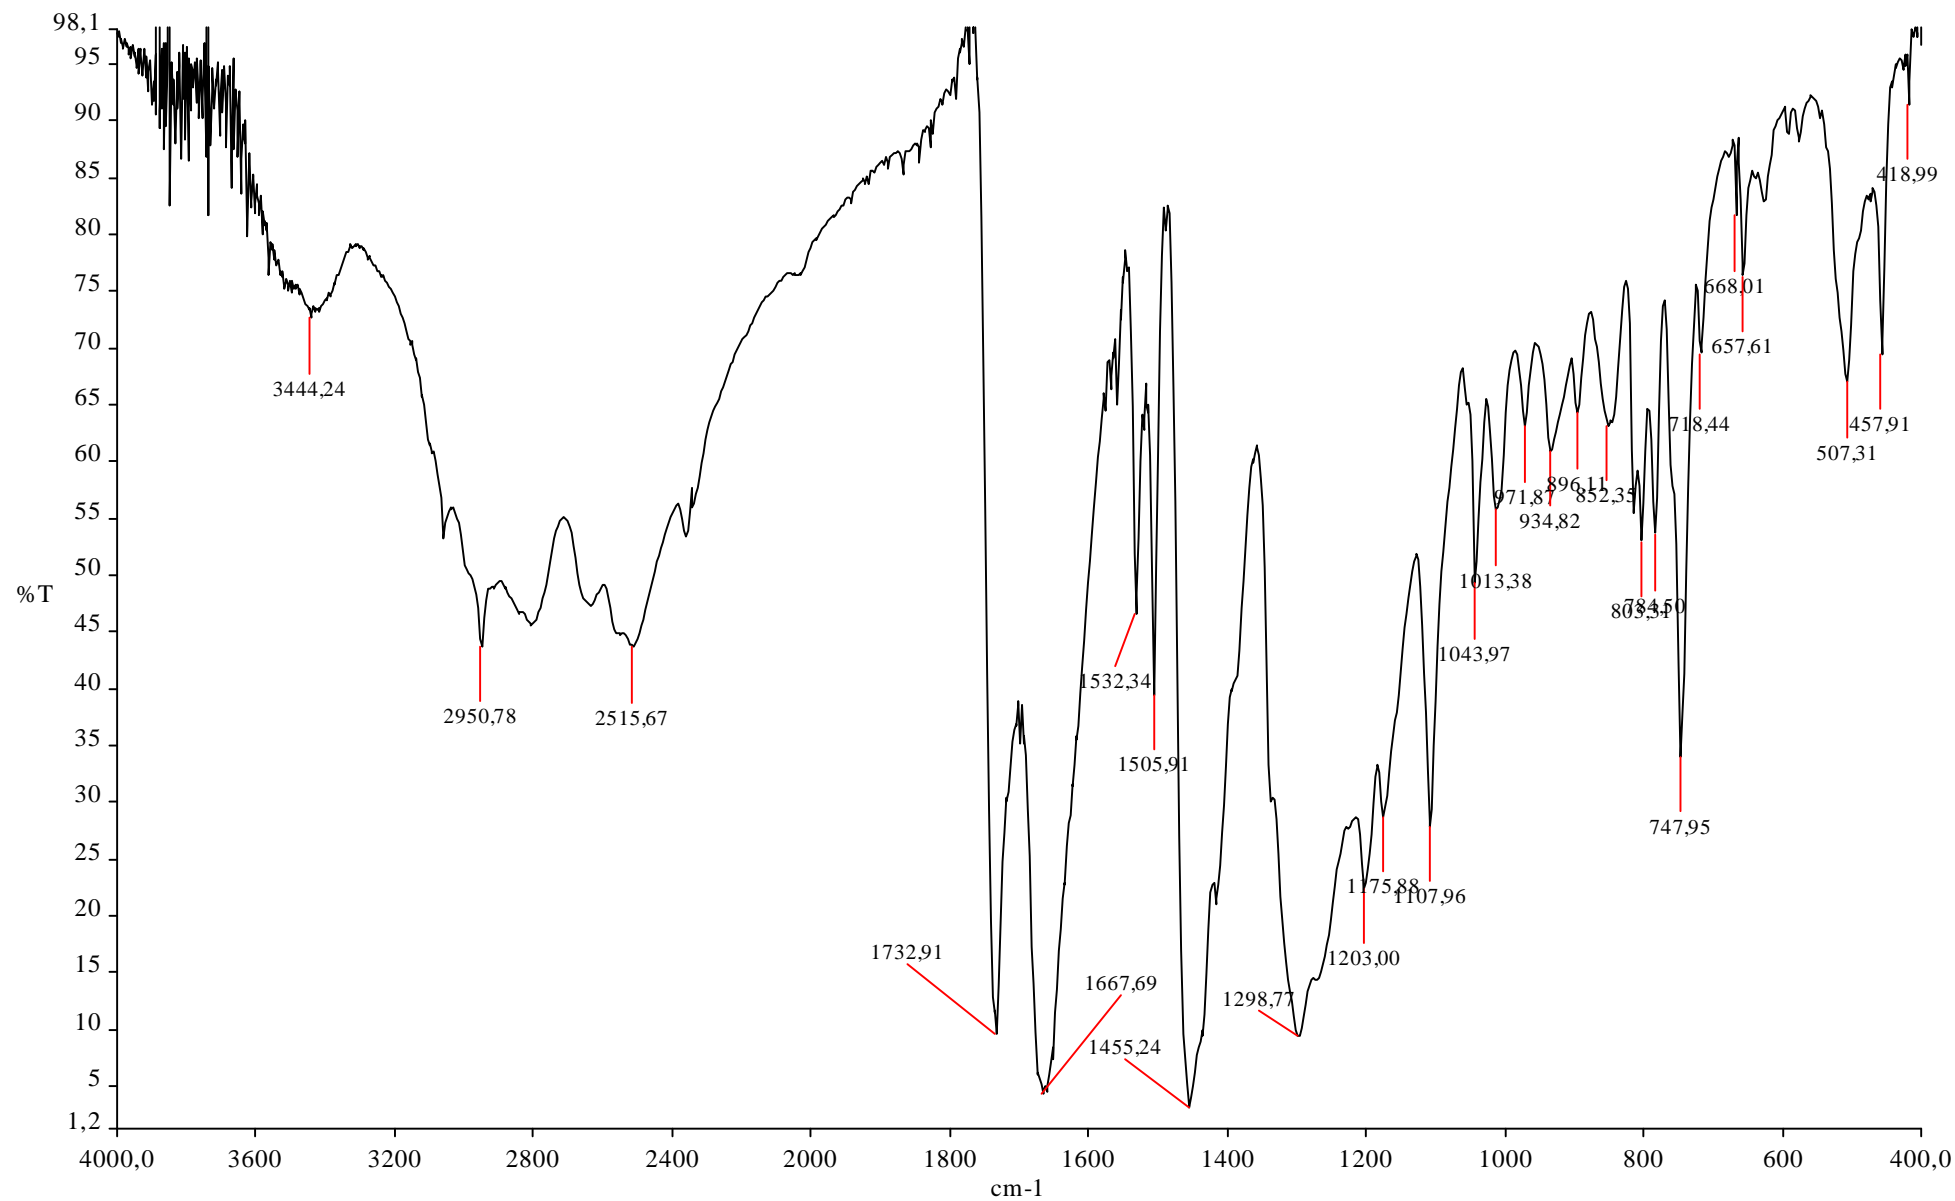

### 16 DiBr p-HTAM

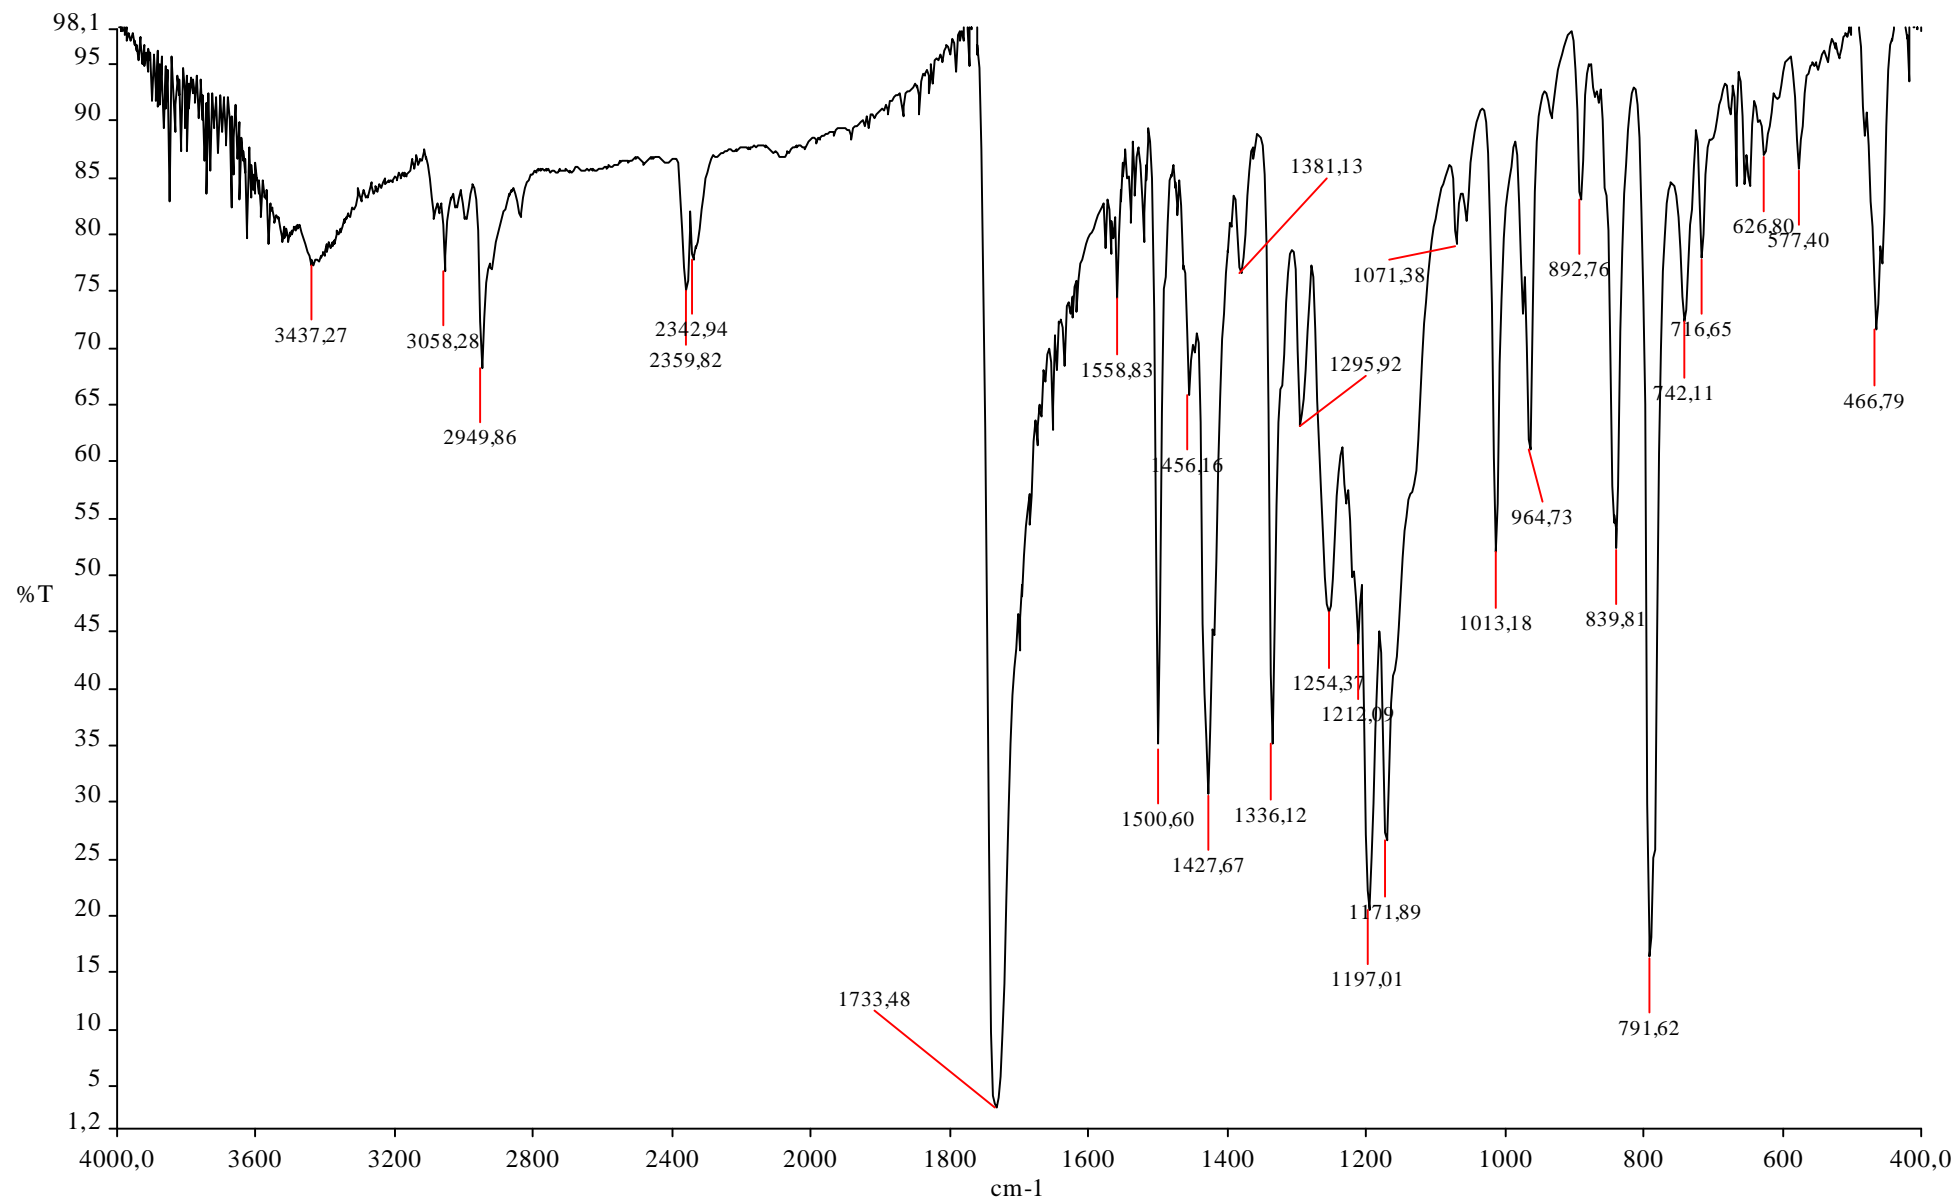

### 18 2-Br thiophene-3-acetic acid methyl ester

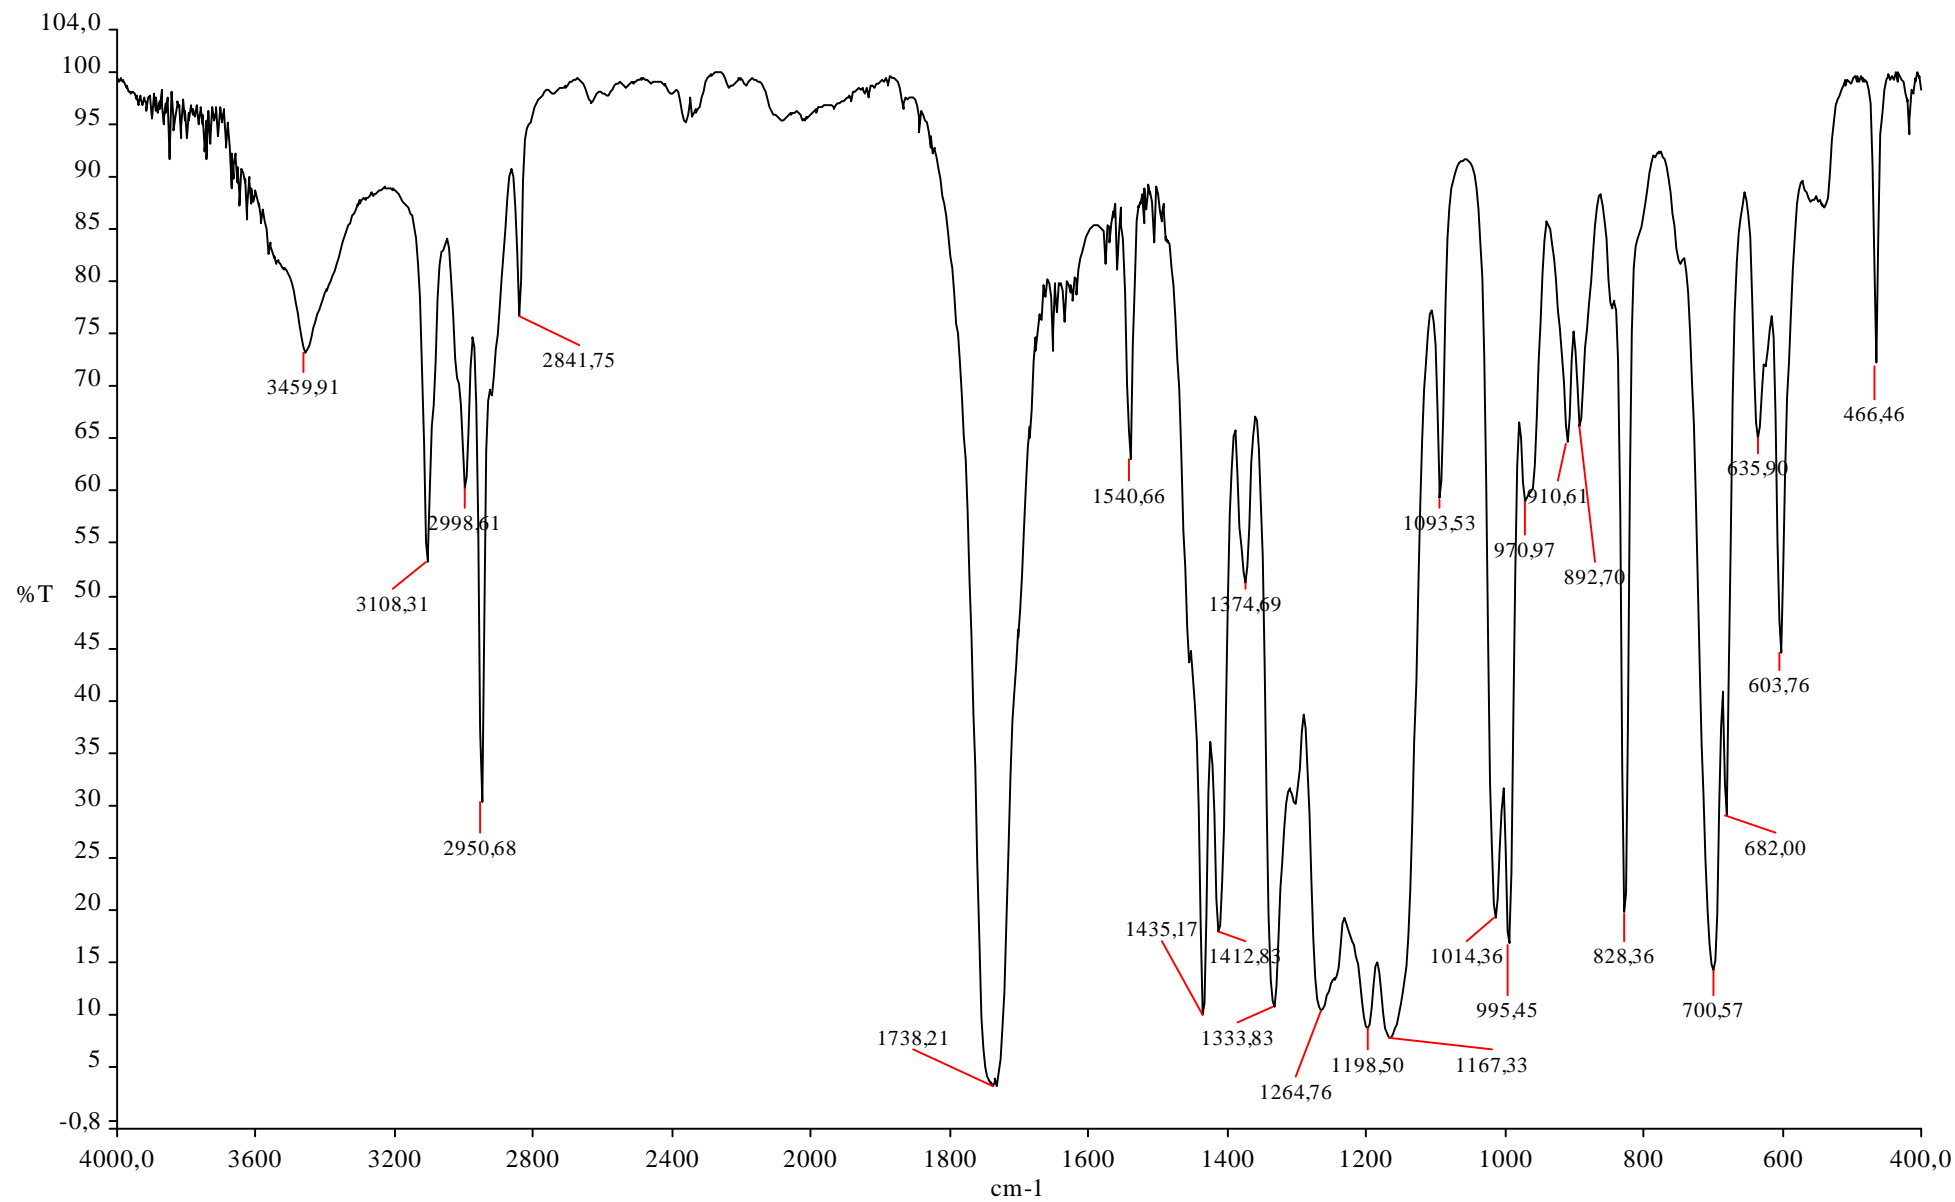

### 19 tHTAM

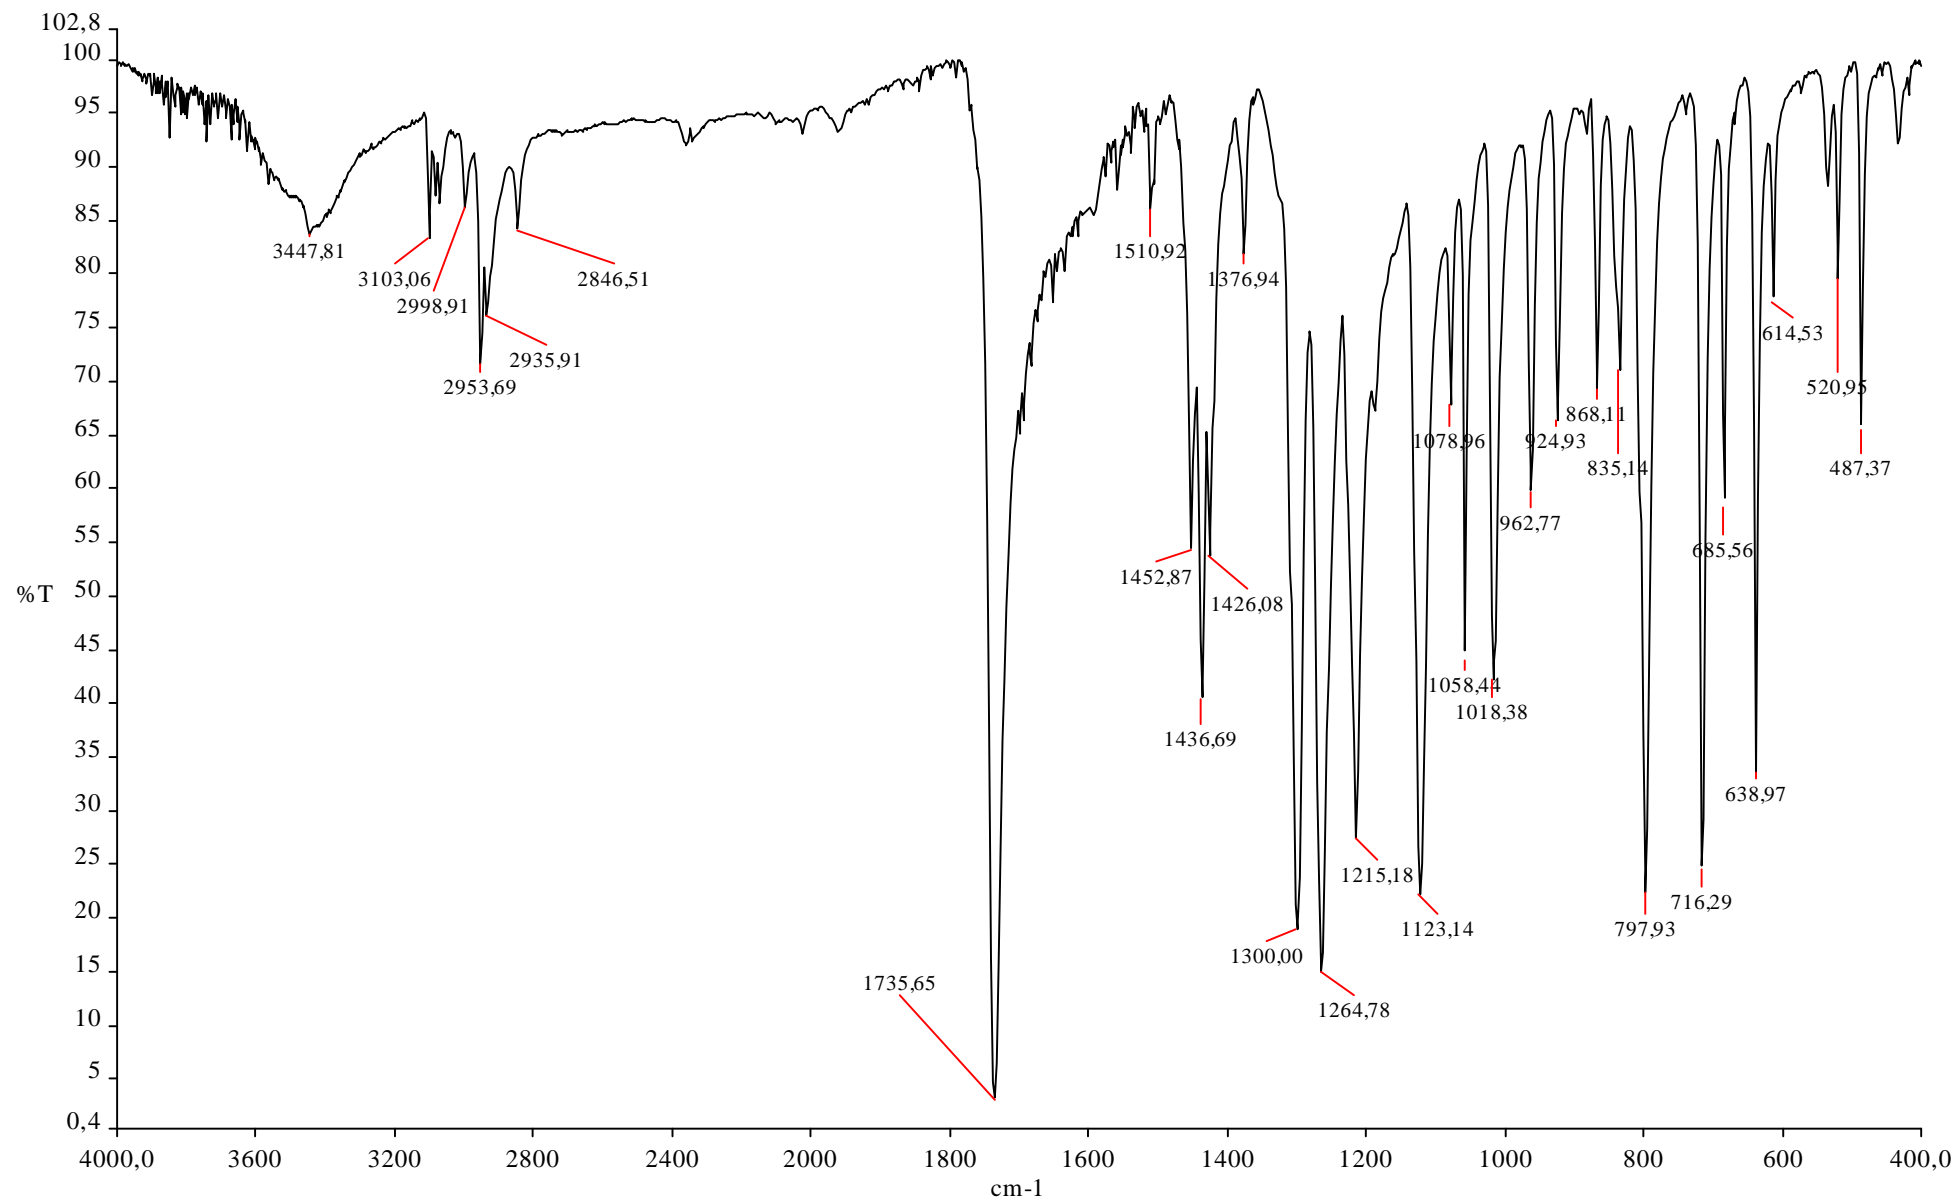

## 20 Br<sub>2</sub>-t-HTAM

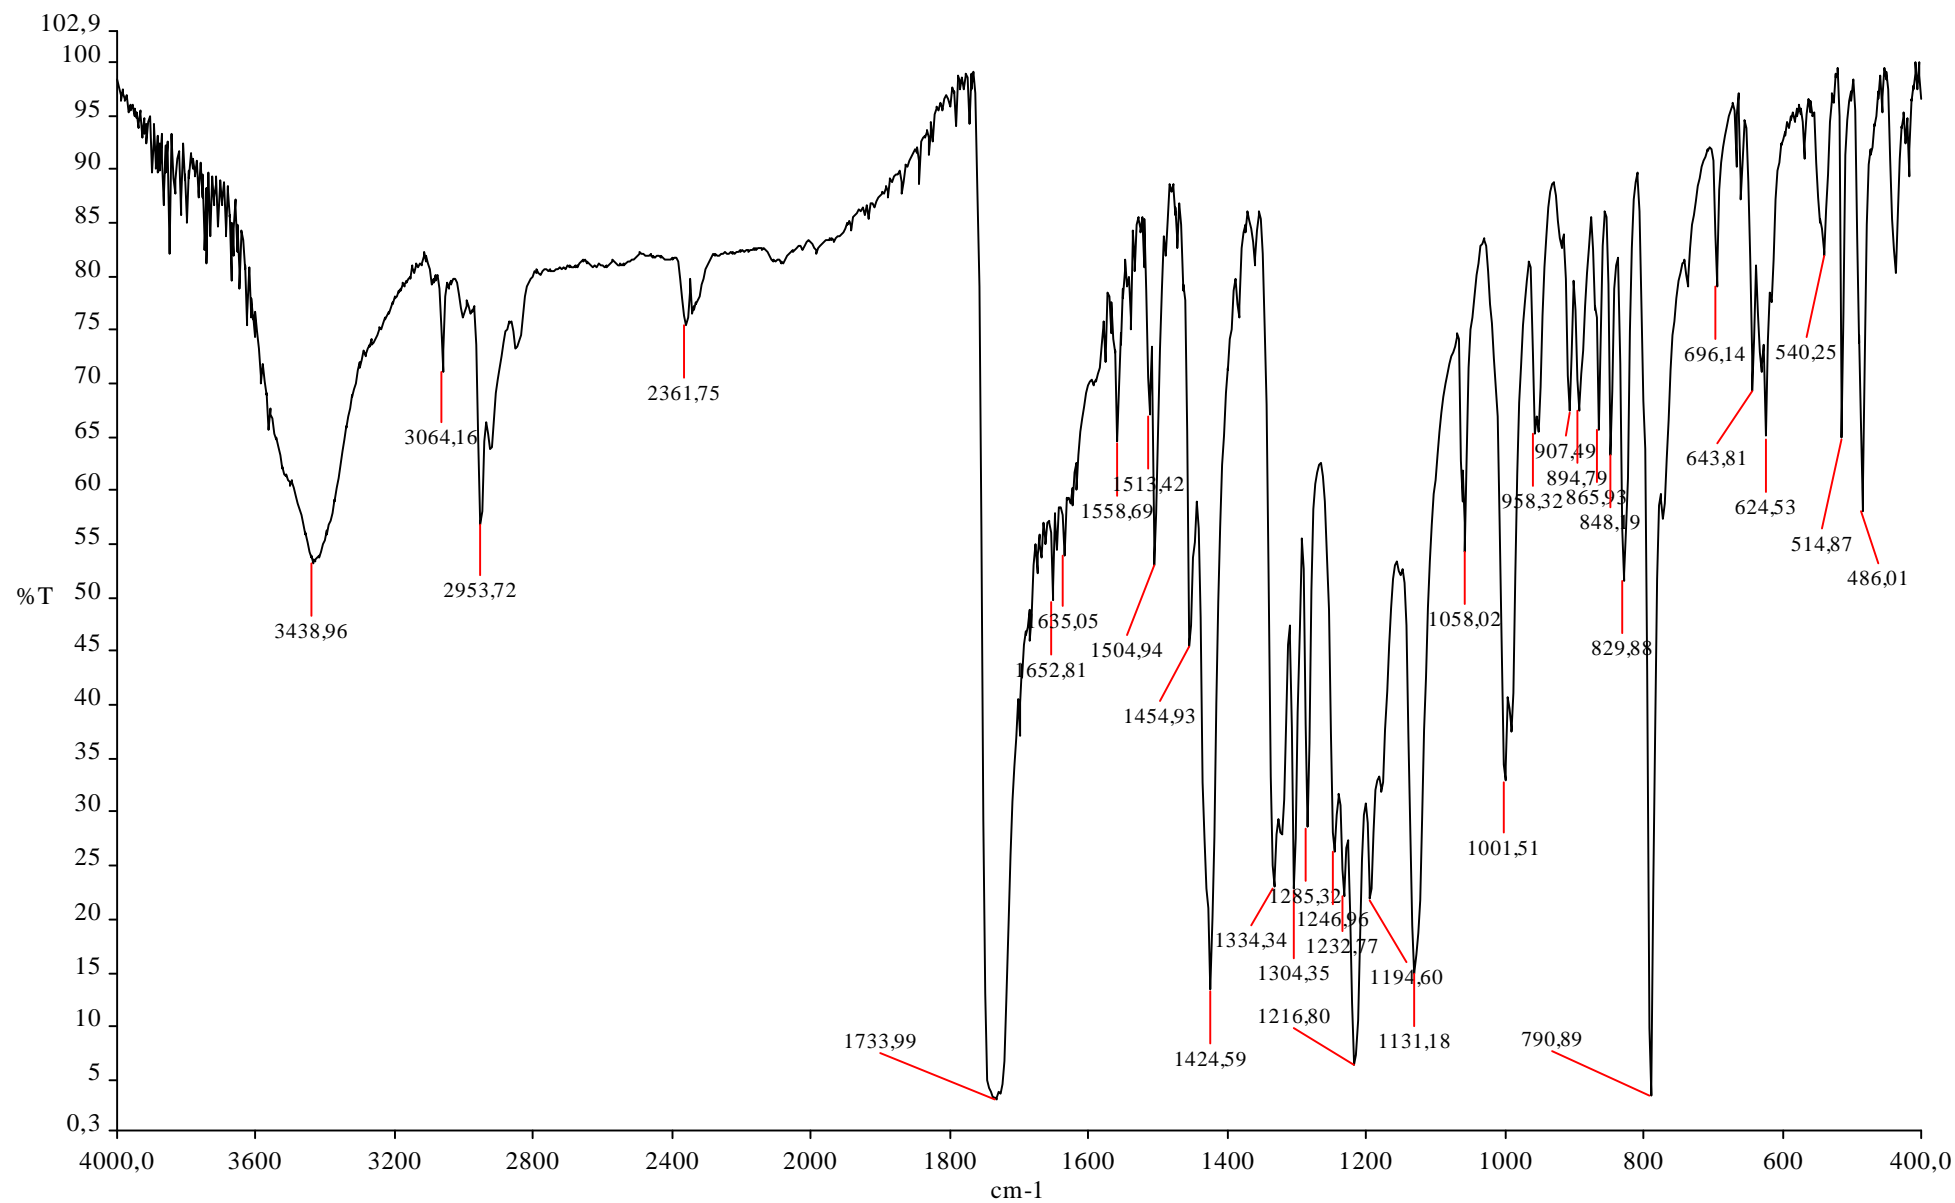

### 21 hx-HTAM

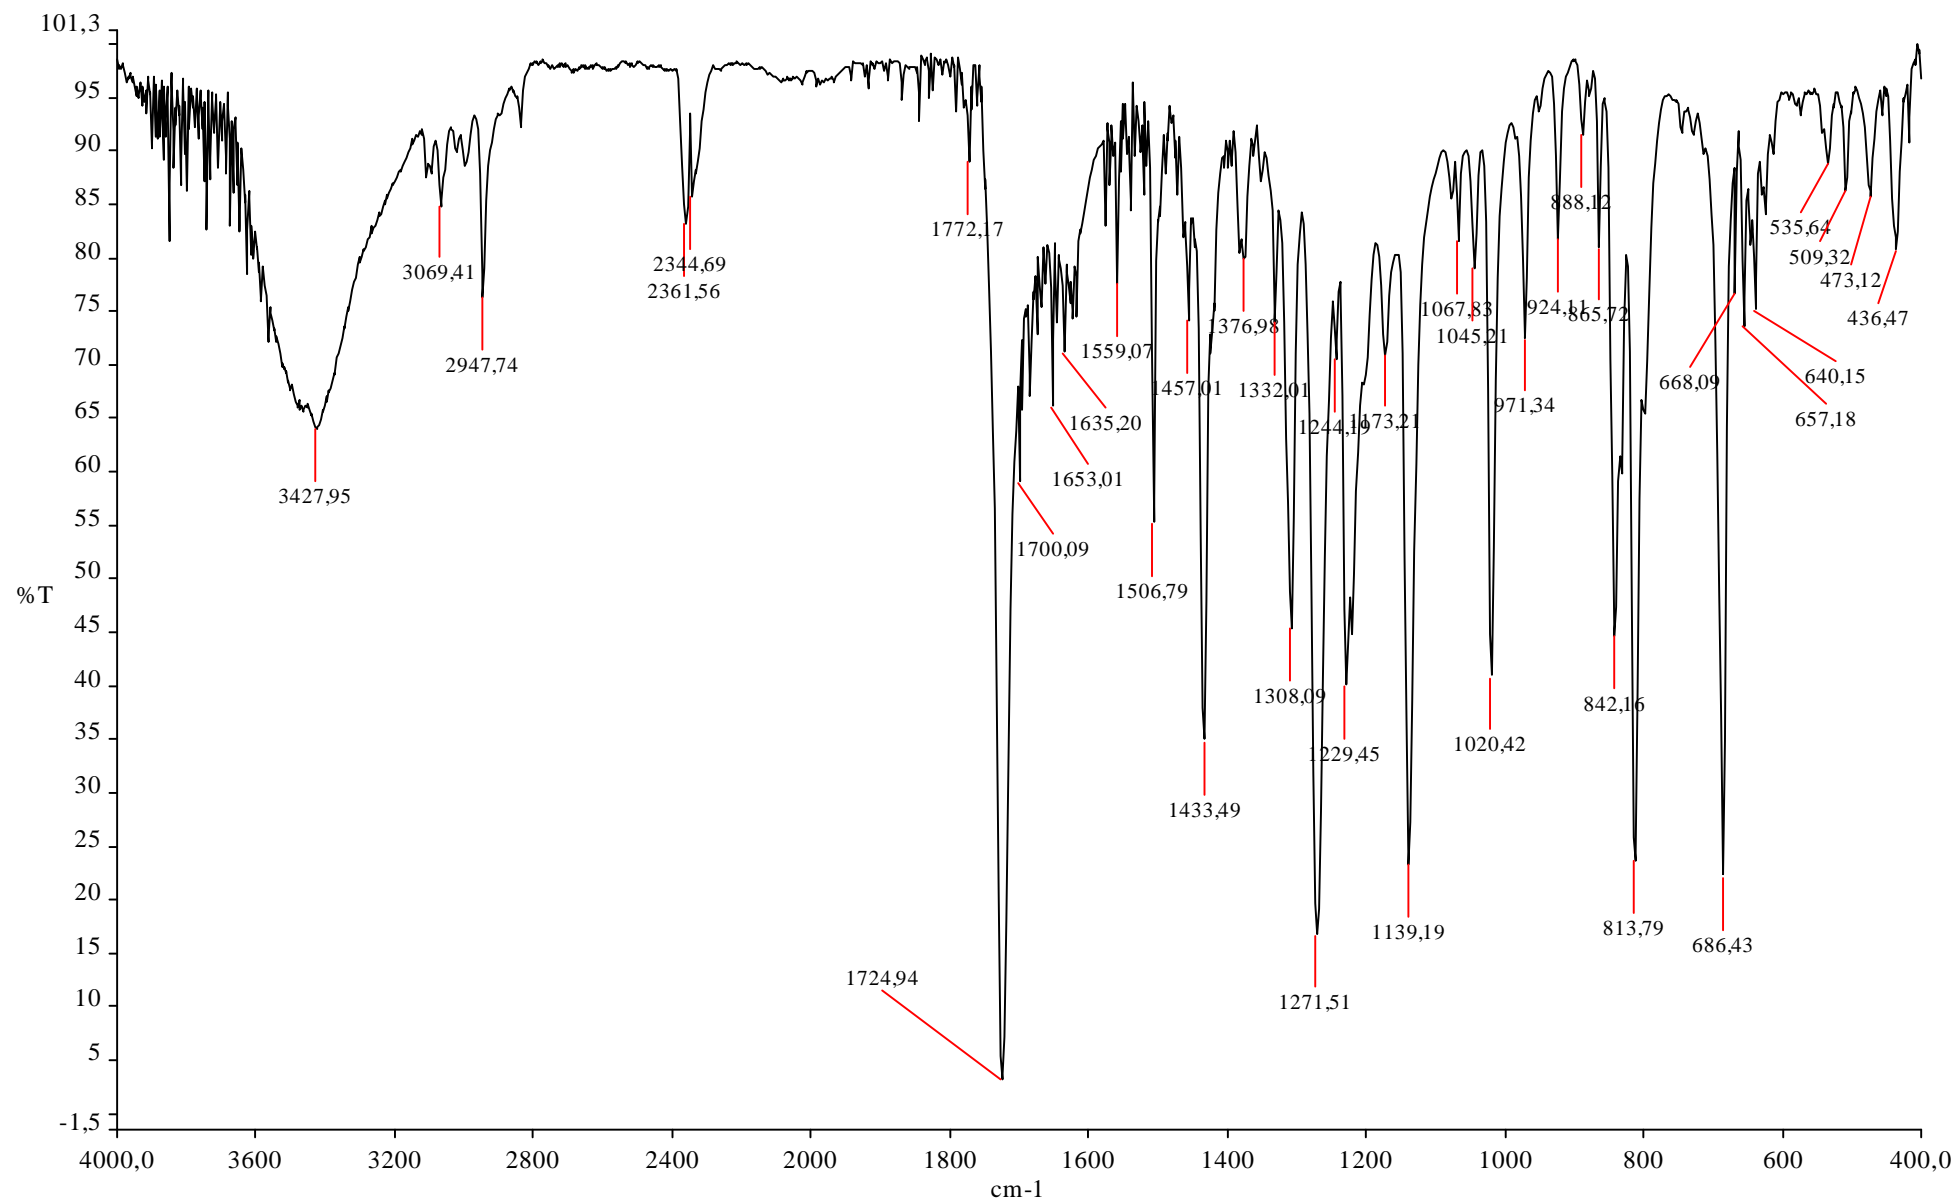

Supplement: c1ob05637a_2.pdf [file c1ob05637a_2.pdf]
